# Supplementary material for: Correlation Dimension in Sumatra Island Based on Active Fault, Earthquake Data, and Estimated Horizontal Crustal Strain to Evaluate Seismic Hazard Functions (SHF)
Source: MDPI journal article supplement (doi:10.3390/geohazards3020012), 2022-04-22

# **Example Display Software For Calculating, Plotting & Mapping**

**Geomechanics and Geohazards Software by Wahyu Triyoso**  
**Software Under Developed**

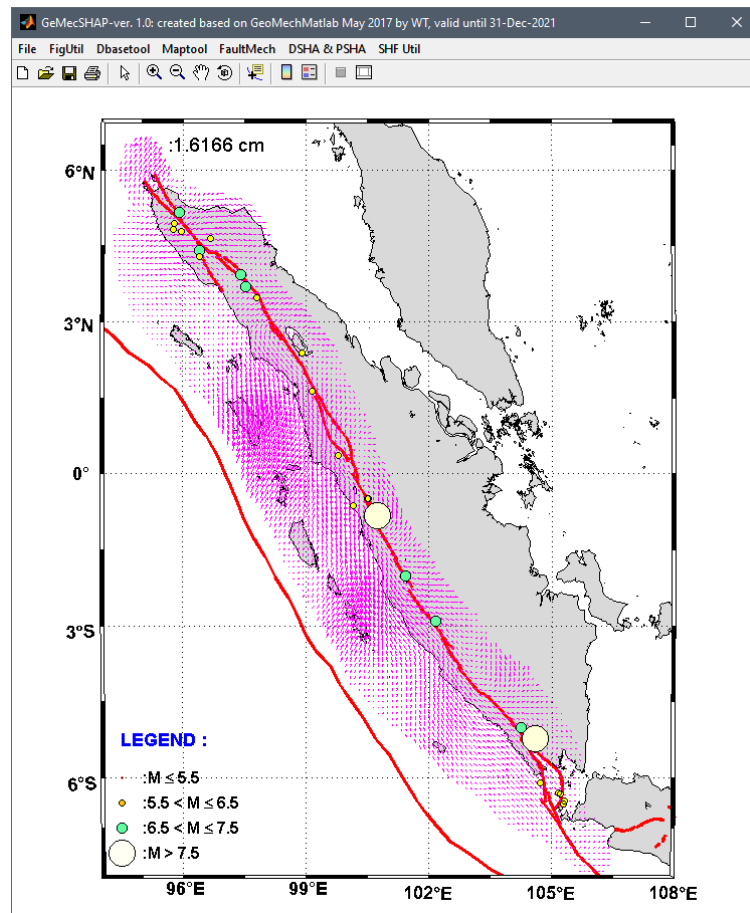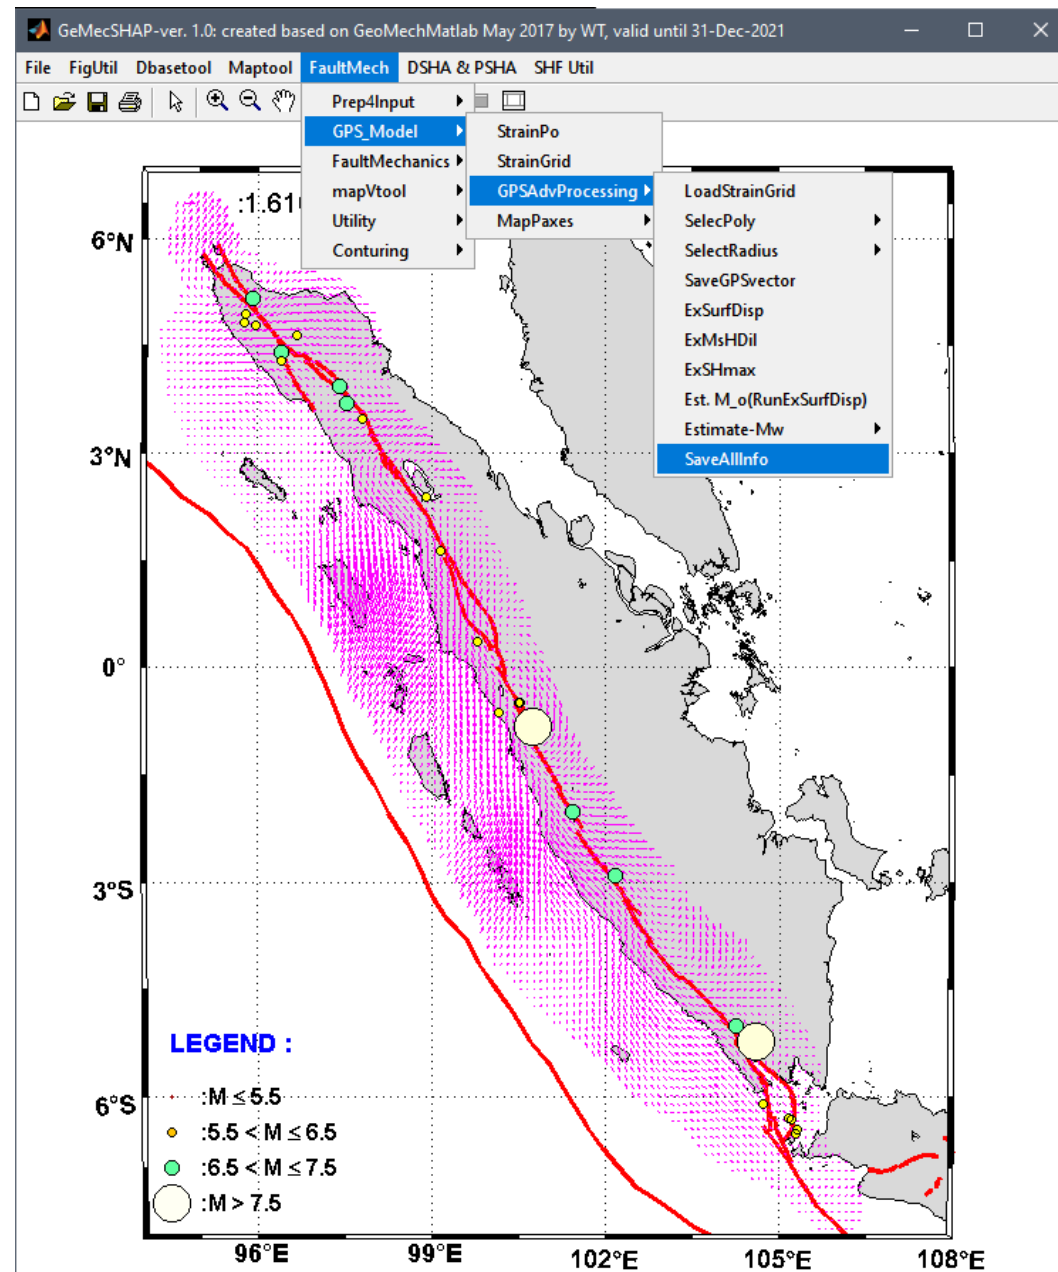

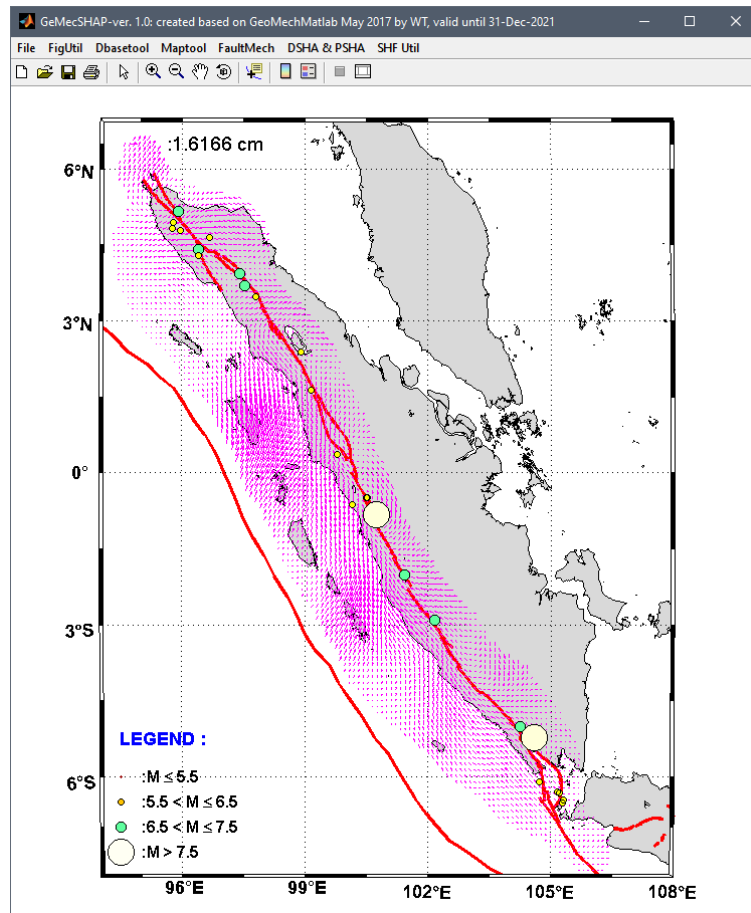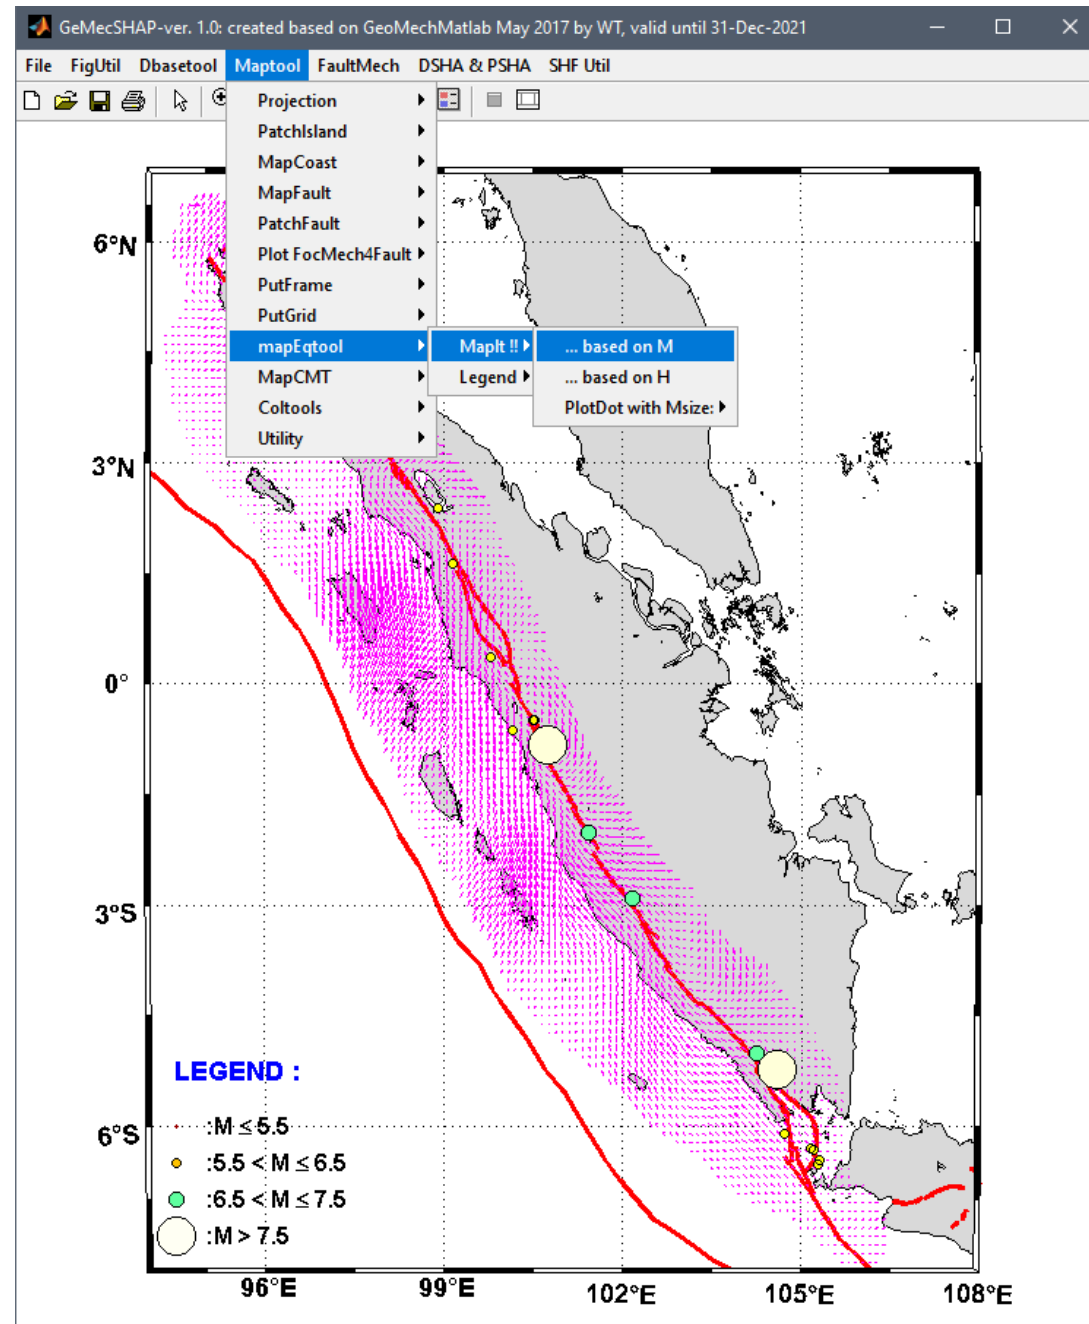

Supplement: s1 [file s1]
